# Supplementary material for: Effects of Pd and Co intimacy in Pd-modified Co/TiO2 catalysts for direct CO2 hydrogenation to fuels: the closer not the better
Source: Royal Society of Chemistry journal article supplement (doi:10.1039/d4cy00324a), 2024-01-01
Supplement: d4cy00324a1.pdf [file d4cy00324a1.pdf]

# Effects of Pd and Co Intimacy in Pd-modified Co/TiO<sub>2</sub> Catalysts for Direct CO<sub>2</sub> Hydrogenation to Fuels: the Closer not the Better

C. Scarfiello, A. Durupt, Y. Tison, D. Pham Minh, K. Soulantica, P. Serp

## Supporting Information

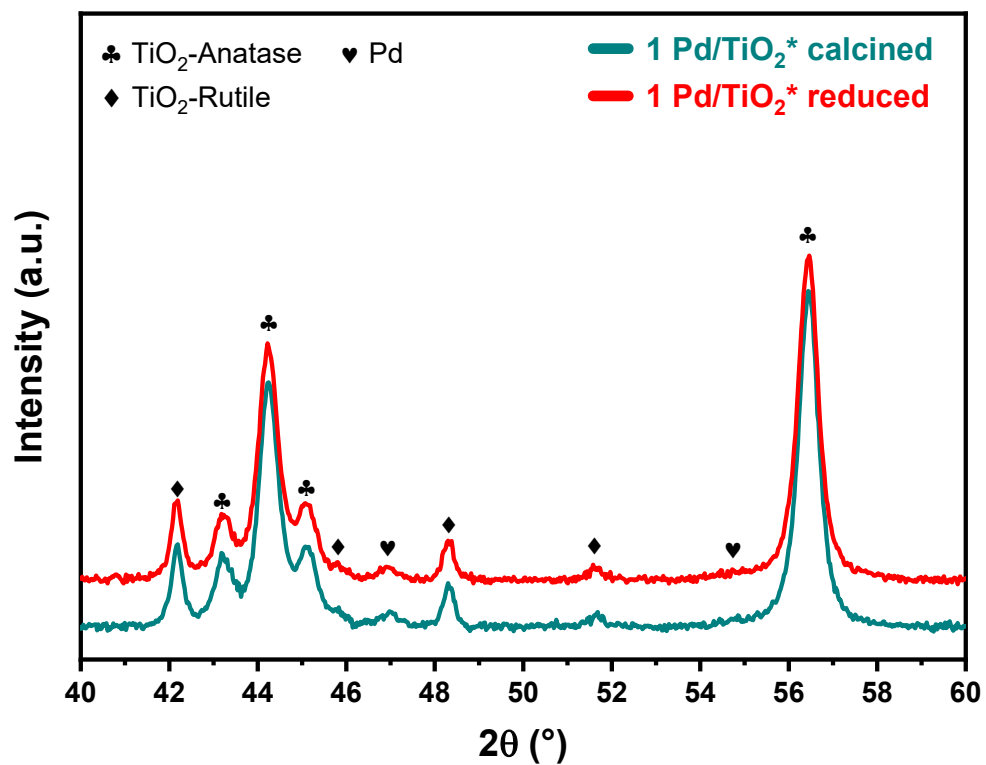

**Figure S1.** XRD diffractograms (40°-60°) of the 1Pd/TiO<sub>2</sub>\* catalyst after calcination and subsequent reduction (4 h, 350 °C, 40% H<sub>2</sub>/Ar).

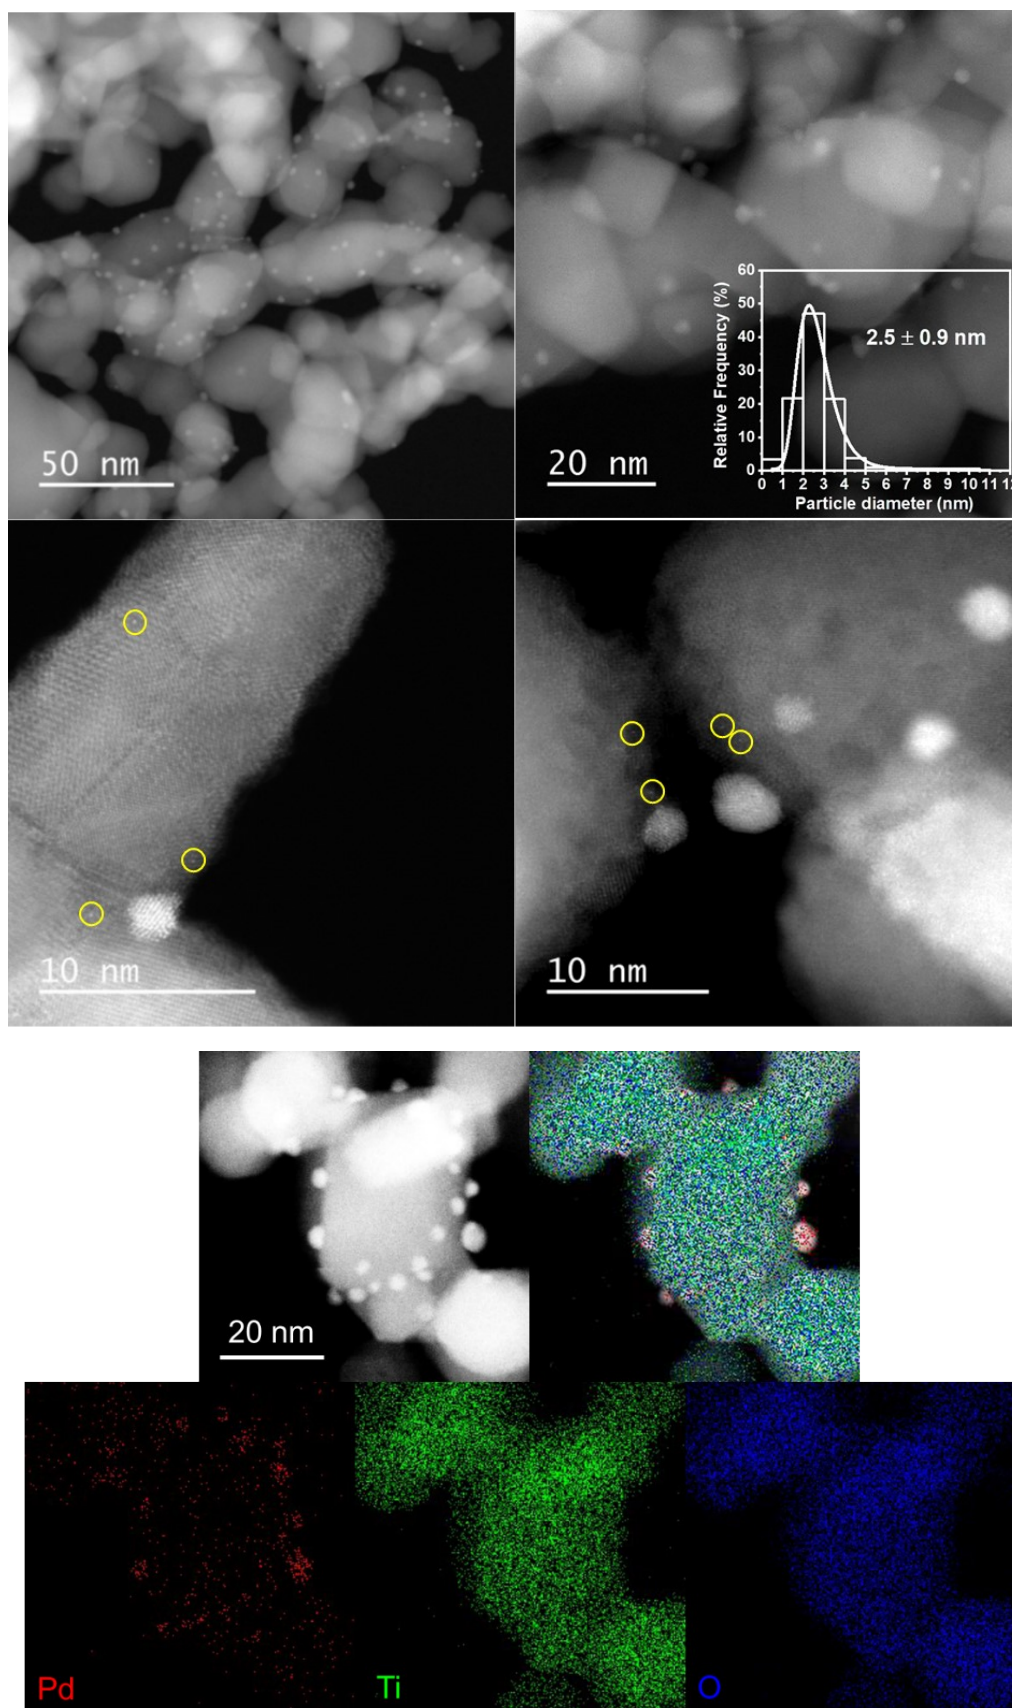

**Figure S2.** HAADF-STEM micrographs with Pd particle size distribution and EDX analysis of the reduced 1Pd/TiO<sub>2</sub>\* catalyst. Pd single atoms are surrounded by a yellow circle for better visualization.

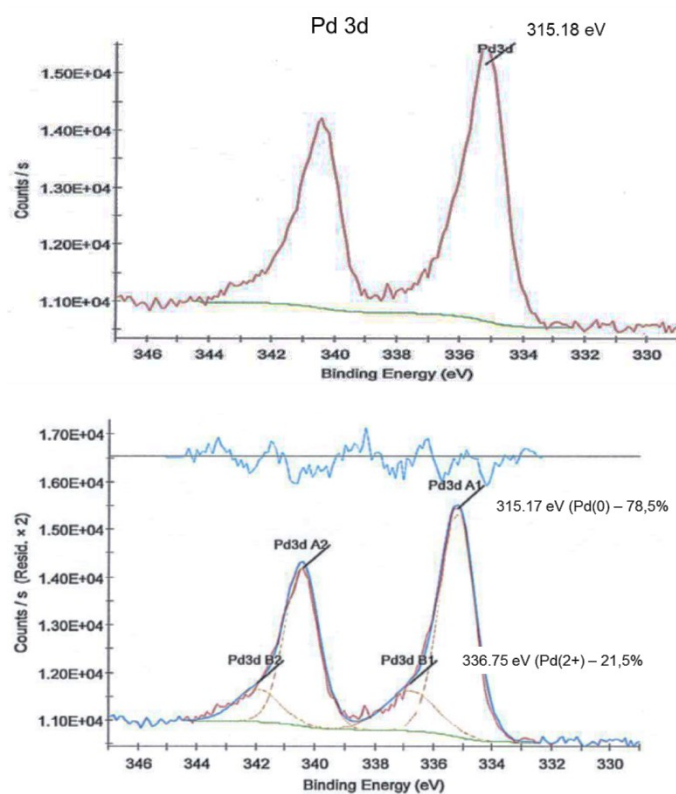

**Figure S3.** High-resolution XPS spectrum of Pd 3d of the sample 1Pd/TiO<sub>2</sub>\*.

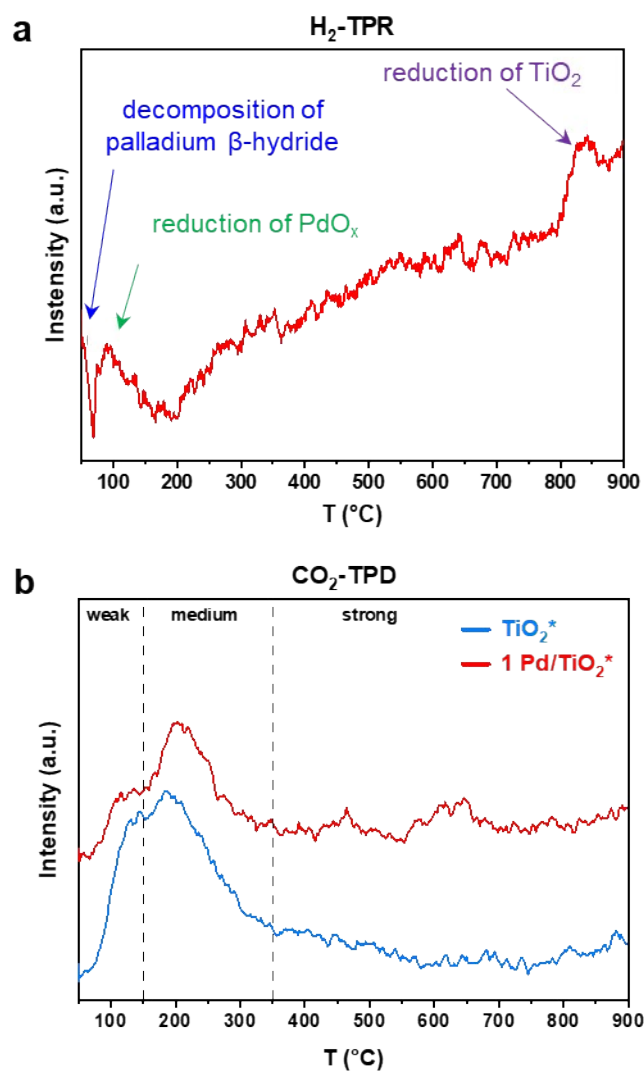

**Figure S4.** **a**  $\text{H}_2$ -TPR profile of the  $1\text{Pd}/\text{TiO}_2^*$  catalyst; and **b**  $\text{CO}_2$ -TPD profiles of the  $1\text{Pd}/\text{TiO}_2^*$  catalyst and of the  $\text{TiO}_2^*$  support.

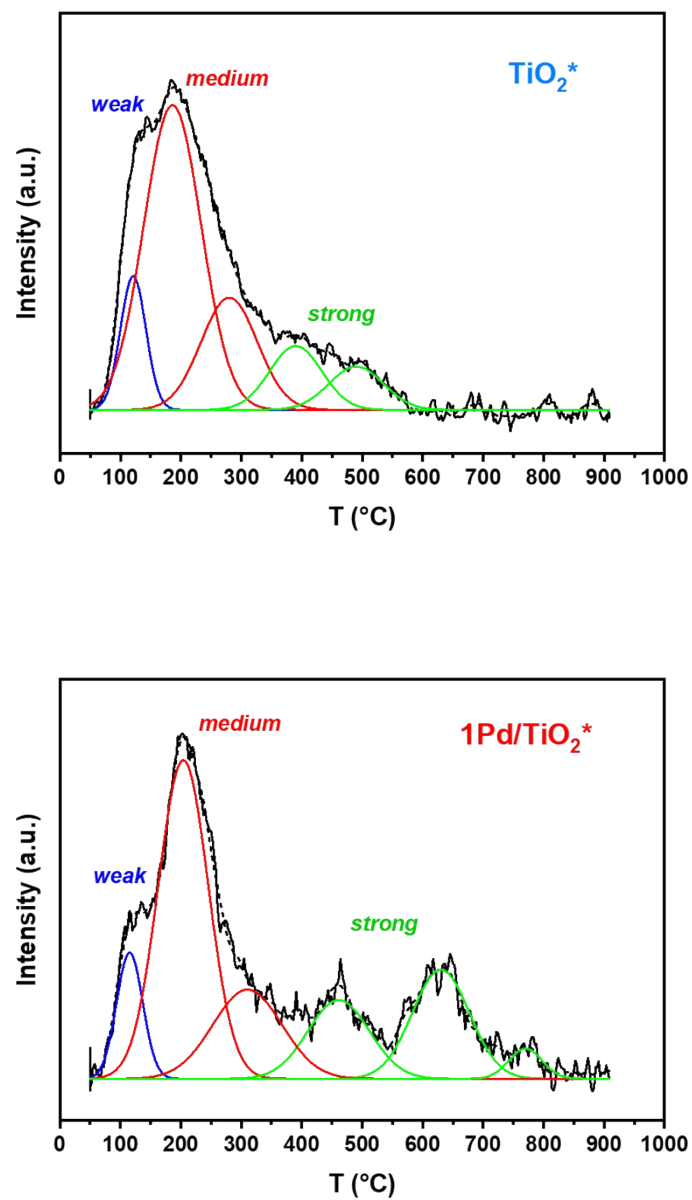

**Figure S5.** CO<sub>2</sub>-TPD profiles and deconvolutions of the support and the 1Pd/TiO<sub>2</sub>\* catalyst.

**Tables S1.** CO<sub>2</sub> adsorption (as cm<sup>3</sup>.g<sup>-1</sup> and as %) resulting from CO<sub>2</sub>-TPD for all the materials used in this study.

As cm<sup>3</sup>/g:

| Catalyst                        | CO <sub>2</sub> Total<br>(cm <sup>3</sup> g <sup>-1</sup> ) | CO <sub>2</sub> Weak<br>(cm <sup>3</sup> g <sup>-1</sup> ) | CO <sub>2</sub> Medium<br>(cm <sup>3</sup> g <sup>-1</sup> ) | CO <sub>2</sub> Strong<br>(cm <sup>3</sup> g <sup>-1</sup> ) | CO <sub>2</sub> [w/(m+s)] |
|---------------------------------|-------------------------------------------------------------|------------------------------------------------------------|--------------------------------------------------------------|--------------------------------------------------------------|---------------------------|
| TiO <sub>2</sub> *              | 69.8                                                        | 7.2                                                        | 50.6                                                         | 12                                                           | 0.12                      |
| 1Pd/TiO <sub>2</sub> *          | 45.0                                                        | 4.0                                                        | 26.6                                                         | 14.5                                                         | 0.10                      |
| 10Co/TiO <sub>2</sub> *         | 38.7                                                        | 20.7                                                       | 17.2                                                         | 0.8                                                          | 1.15                      |
| 0.1Pd-10Co-o/TiO <sub>2</sub> * | 46.3                                                        | 8.4                                                        | 34.0                                                         | 3.9                                                          | 0.22                      |
| 0.1Pd-10Co-r/TiO <sub>2</sub> * | 35.4                                                        | 5.2                                                        | 18.4                                                         | 11.8                                                         | 0.17                      |
| 1Pd-10Co-o/TiO <sub>2</sub> *   | 28.3                                                        | 3.4                                                        | 19.8                                                         | 5.1                                                          | 0.14                      |

As percentage:

| Catalyst                        | CO <sub>2</sub> Total<br>(%) | CO <sub>2</sub> Weak<br>(%) | CO <sub>2</sub> Medium<br>(%) | CO <sub>2</sub> Strong<br>(%) | CO <sub>2</sub> [w/(m+s)] |
|---------------------------------|------------------------------|-----------------------------|-------------------------------|-------------------------------|---------------------------|
| TiO <sub>2</sub> *              | 100                          | 10.4                        | 72.4                          | 17.2                          | 0.12                      |
| 1Pd/TiO <sub>2</sub> *          | 100                          | 8.8                         | 59.0                          | 32.2                          | 0.10                      |
| 10Co/TiO <sub>2</sub> *         | 100                          | 53.5                        | 44.4                          | 2.1                           | 1.15                      |
| 0.1Pd-10Co-o/TiO <sub>2</sub> * | 100                          | 18.2                        | 73.5                          | 8.3                           | 0.22                      |
| 0.1Pd-10Co-r/TiO <sub>2</sub> * | 100                          | 14.6                        | 52.1                          | 33.4                          | 0.17                      |
| 1Pd-10Co-o/TiO <sub>2</sub> *   | 100                          | 12.1                        | 70.0                          | 17.9                          | 0.14                      |

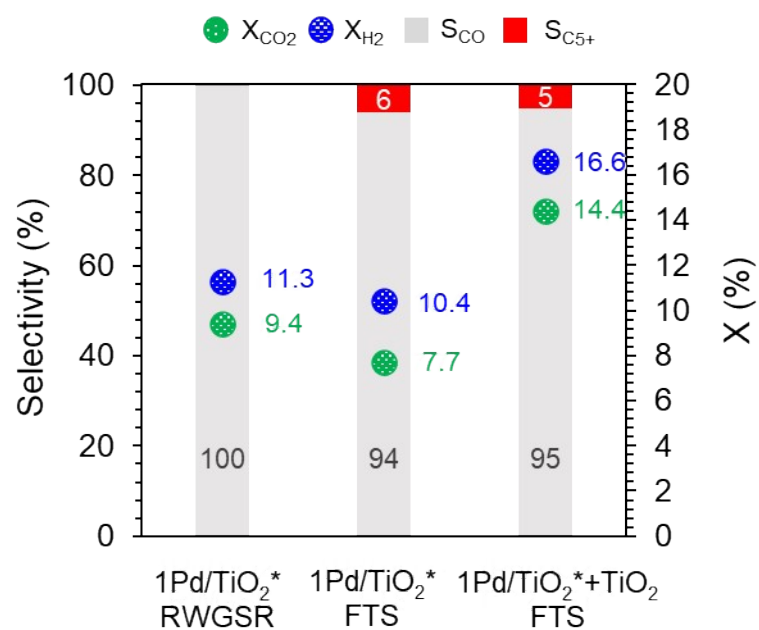

**Figure S6.** Conversions  $X$  ( $CO_2$ : green;  $H_2$ : blue ) and selectivity ( $CO$ : grey;  $C_{5+}$ : red) for the 1%Pd/TiO<sub>2</sub>\* catalyst at 60 hours on stream under various conditions,  $T = 220\text{ }^{\circ}C$ ,  $P = 20\text{ bar}$ ,  $WHSV = 1620\text{ mL g}_{cat}^{-1}\text{ h}^{-1}$ . RWGSR and FTS correspond to the feeding ratio of  $H_2/CO_2 = 1/1$  and  $2/1$ , respectively.

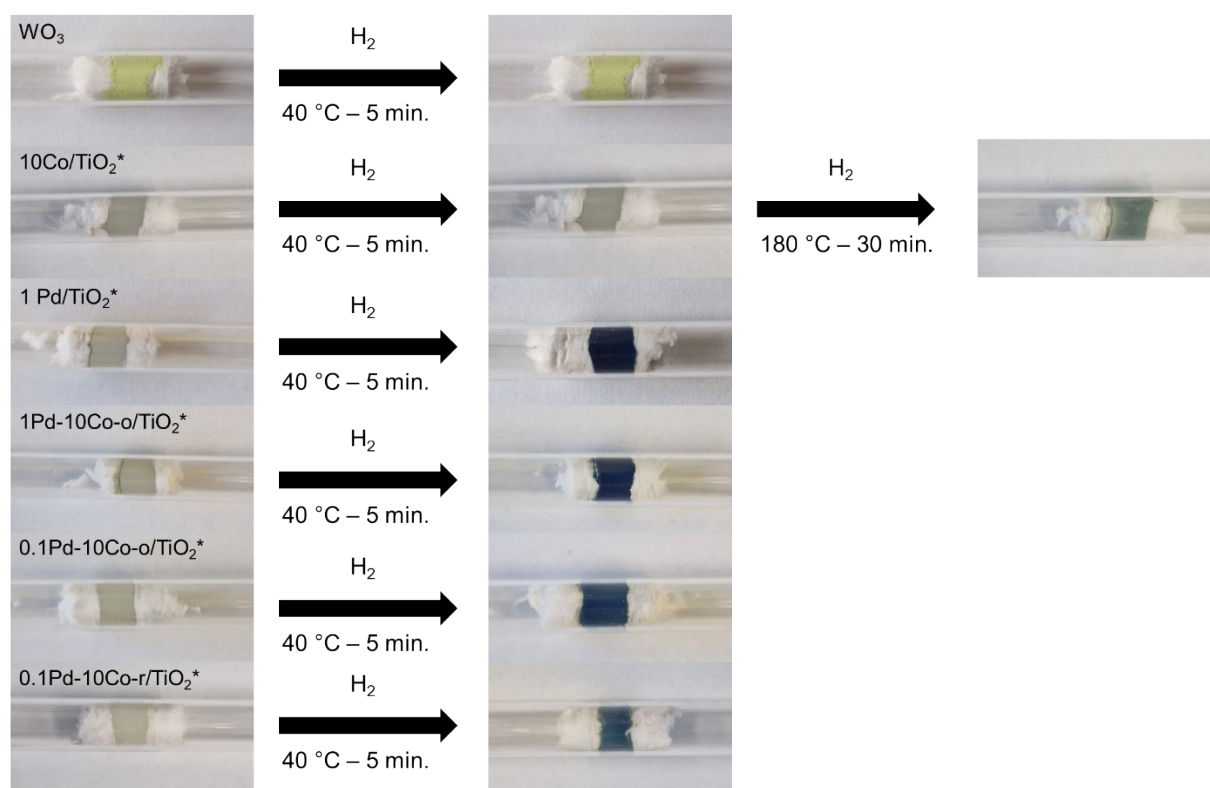

**Figure S7.** Photographs of samples made with 1 g of  $\text{WO}_3$  mixed or not with 5 mg of the catalysts investigated in this study before (left) and after (right) treatment with  $\text{H}_2$  ( $10\text{ mL min}^{-1}$ ) at  $40\text{ }^\circ\text{C}$  for 5 min.

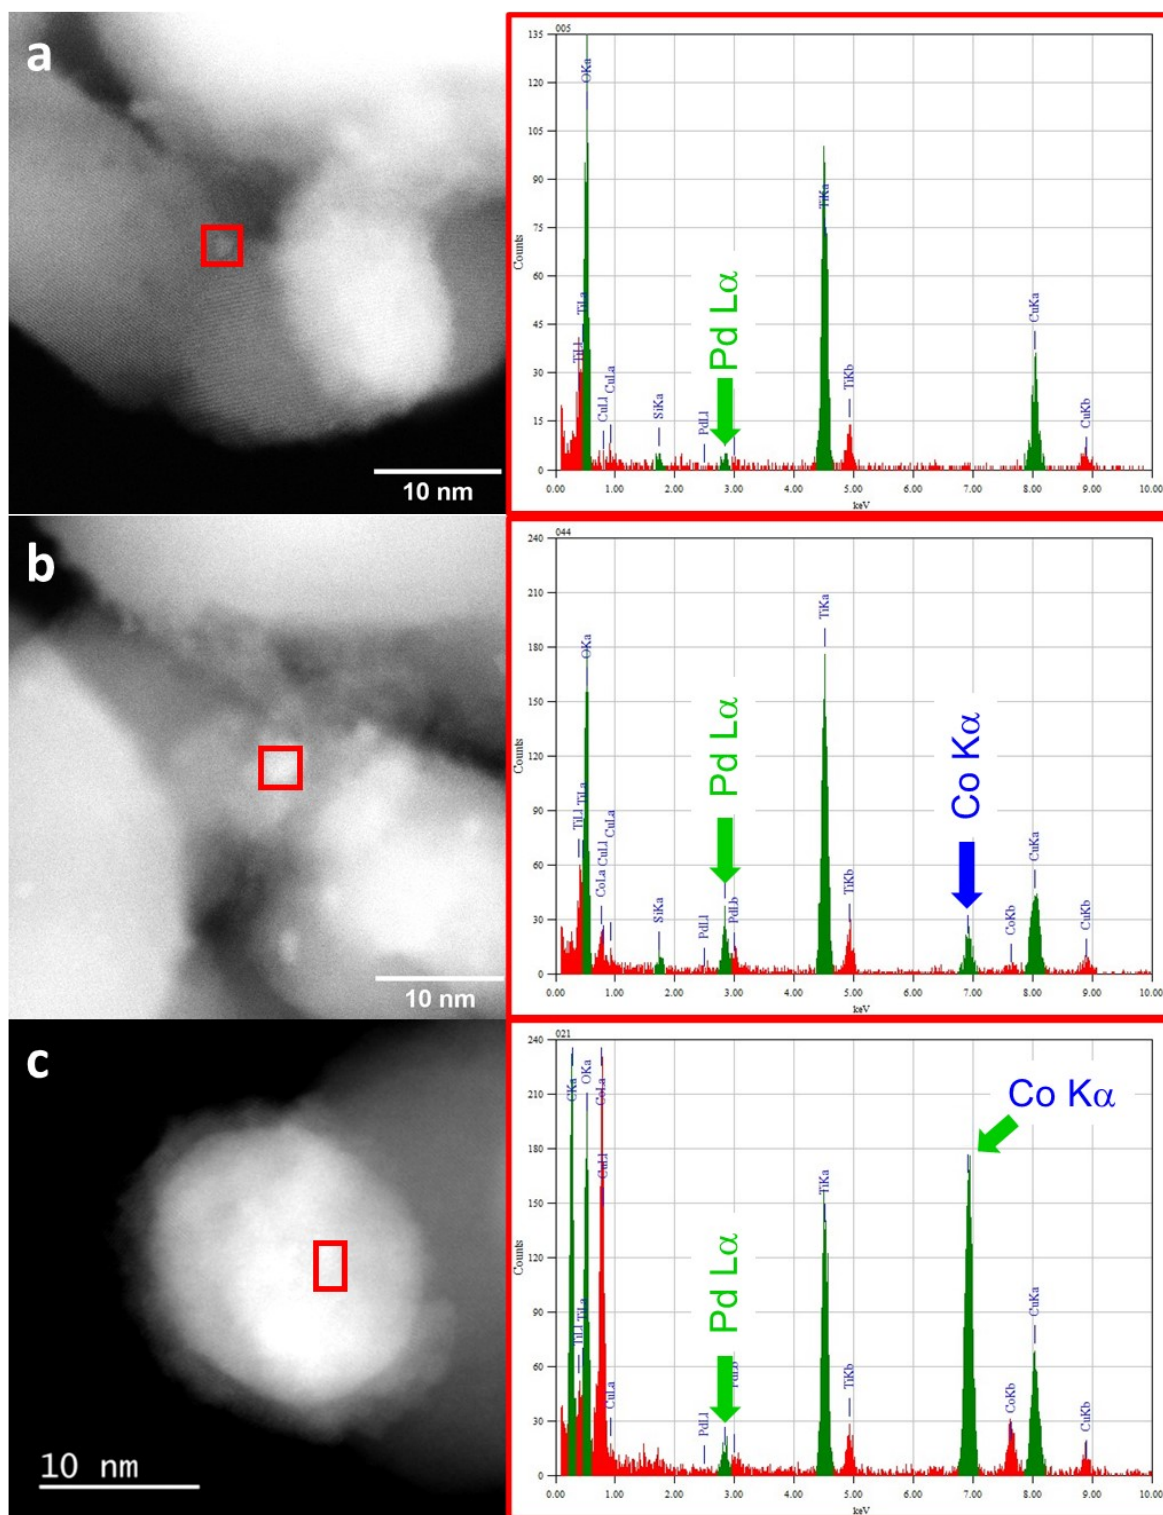

**Figure S8.** HAADF-STEM micrographs and EDX analysis of the reduced: **a** and **b** 0.1Pd-10Co-o/TiO<sub>2</sub>\*; and **c** 0.1Pd-10Co-r/TiO<sub>2</sub>\* catalysts.

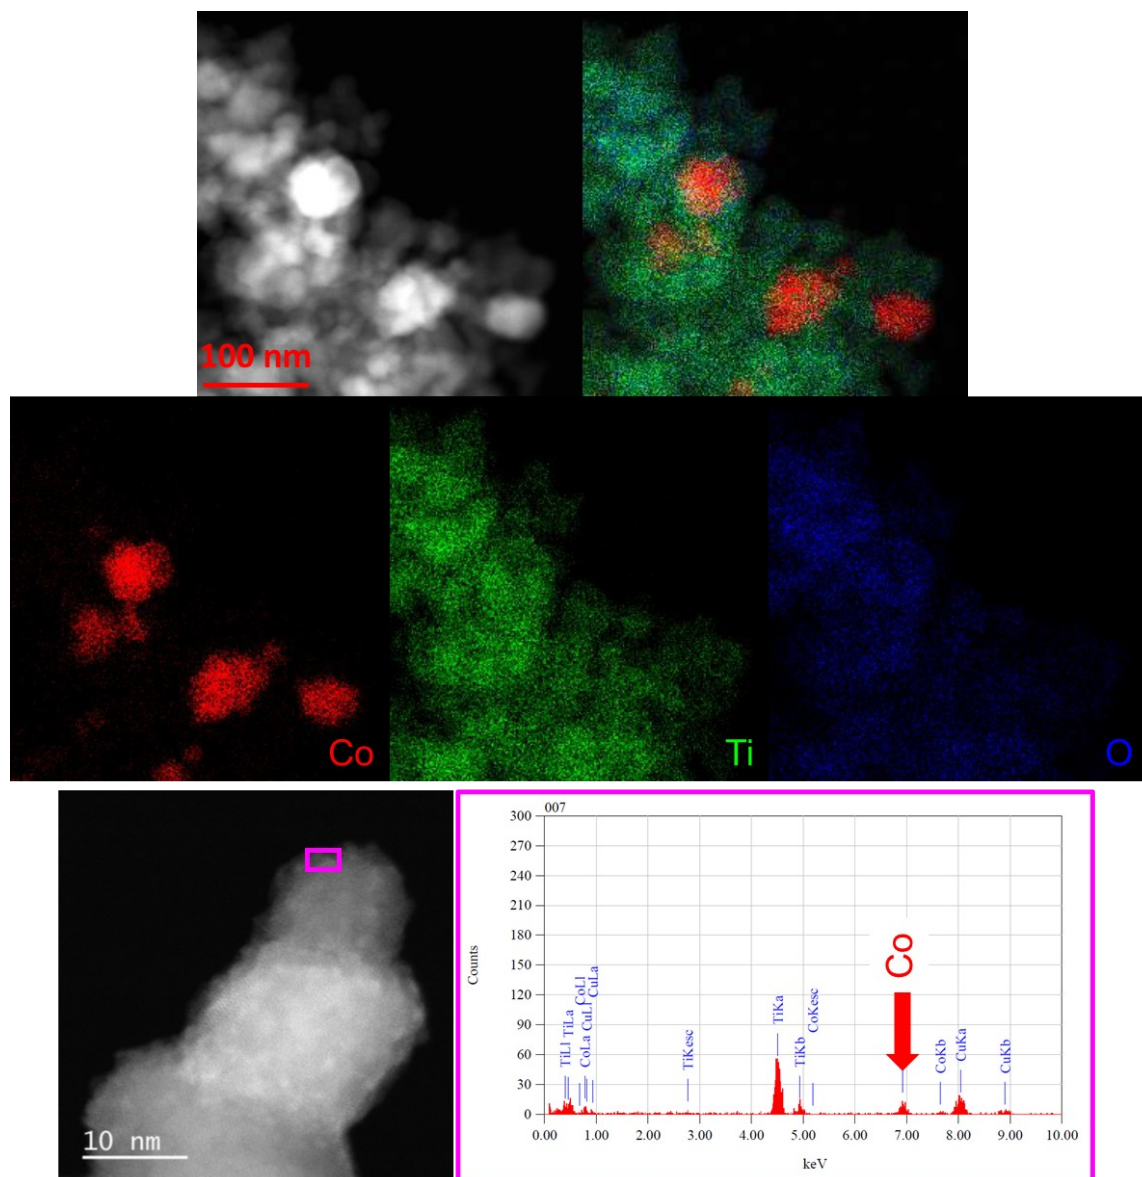

**Figure S9.** HAADF-STEM micrographs and EDX analysis of the reduced 10Co/TiO<sub>2</sub>\* catalyst.

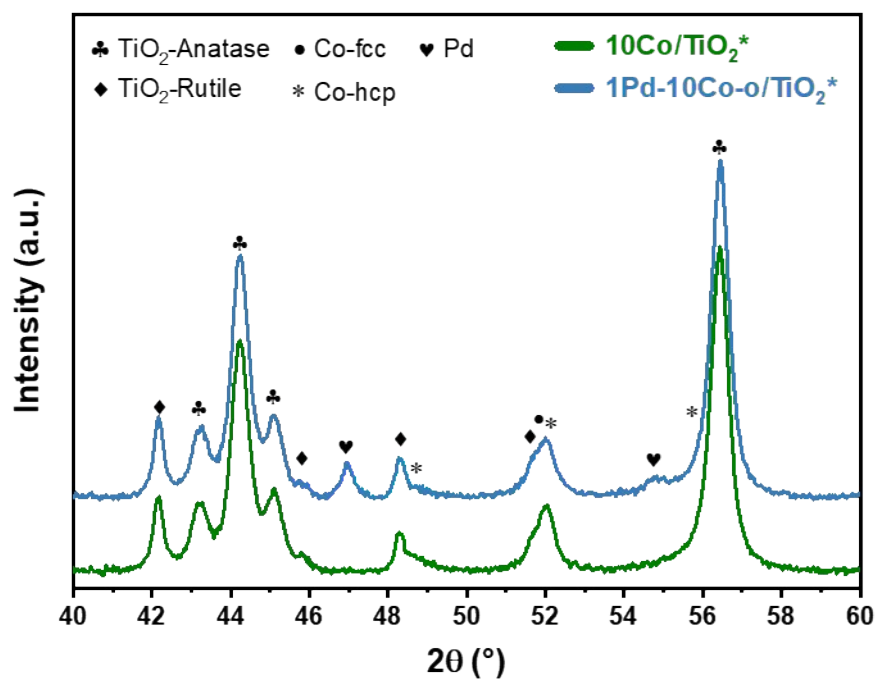

**Figure S10.** XRD diffractograms (40°-60°) of the 10Co/TiO<sub>2</sub>\* and 1Pd-10Co-o/TiO<sub>2</sub>\* catalysts.

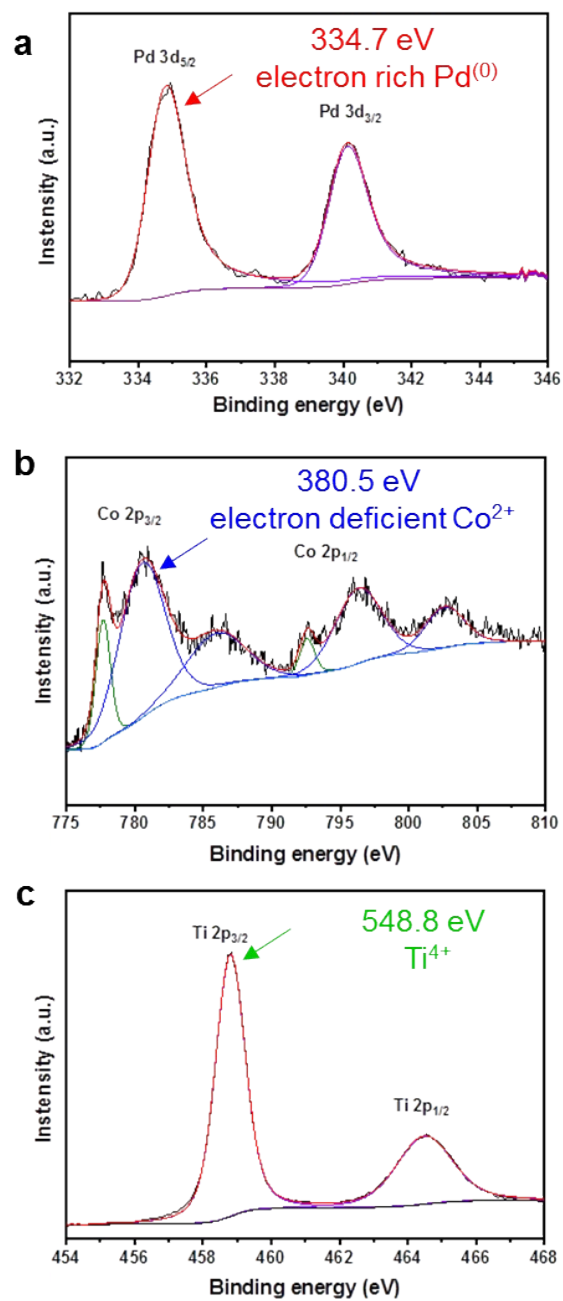

**Figure S11.** High-resolution XPS spectra of: **a** Pd 3d; **b** Co 2p; and **c** Ti 2p regions of the 1Pd-10Co-o/TiO<sub>2</sub>\* catalyst.

**Table S2.** H<sub>2</sub> consumption (cm<sup>3</sup>/g) from H<sub>2</sub>-TPR for the catalyst monometallic 10Co/TiO<sub>2</sub>\* and bimetallic catalysts.

| Catalyst                        | H <sub>2</sub> -TPR<br>(cm <sup>3</sup> g <sup>-1</sup> ) |
|---------------------------------|-----------------------------------------------------------|
| 10Co/TiO <sub>2</sub> *         | 47.3                                                      |
| 0.1Pd-10Co-o/TiO <sub>2</sub> * | 43.7                                                      |
| 0.1Pd-10Co-r/TiO <sub>2</sub> * | 37.0                                                      |
| 1Pd-10Co-o/TiO <sub>2</sub> *   | 48.2                                                      |

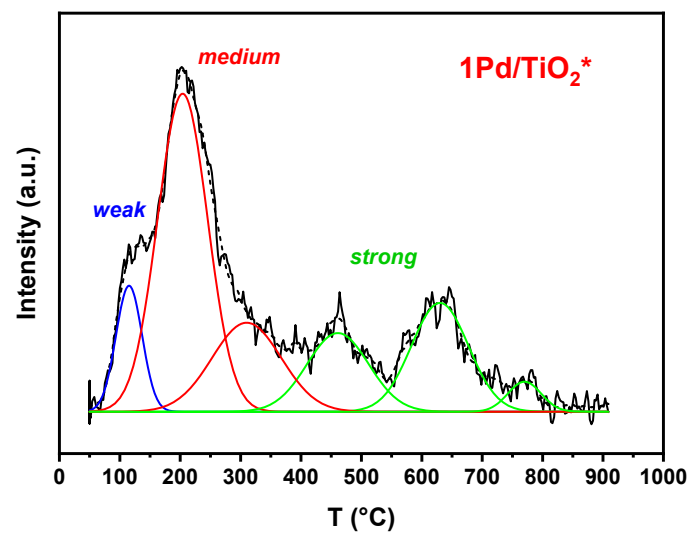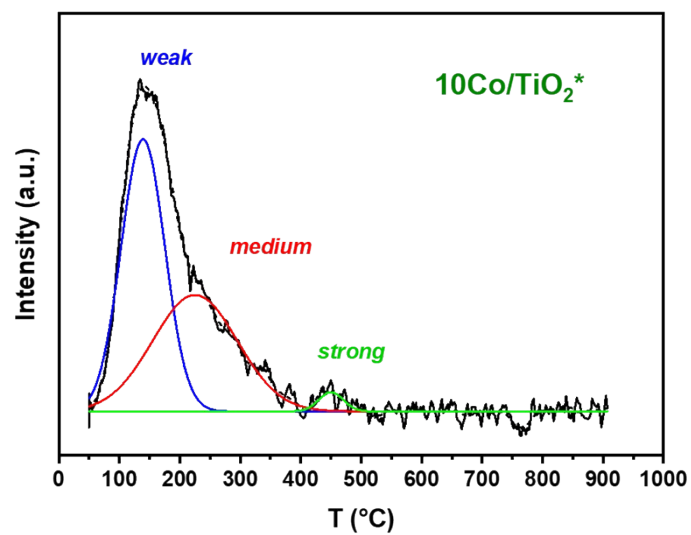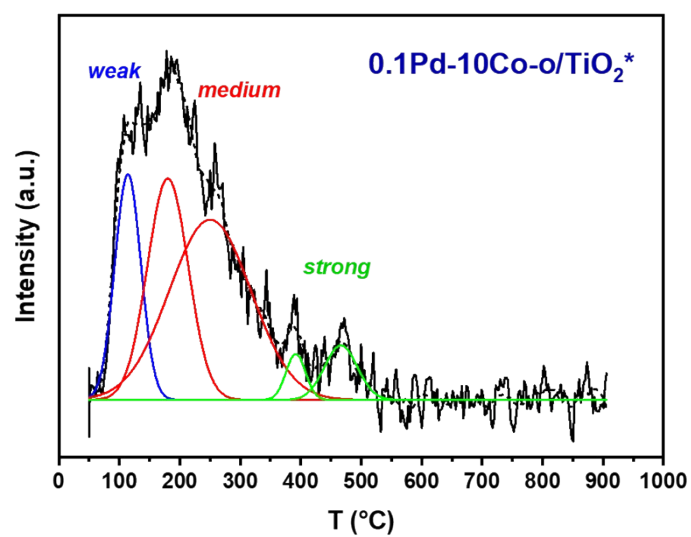

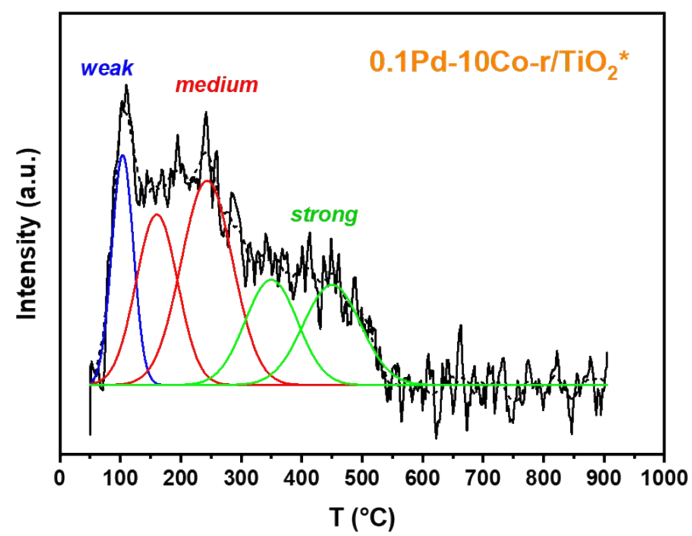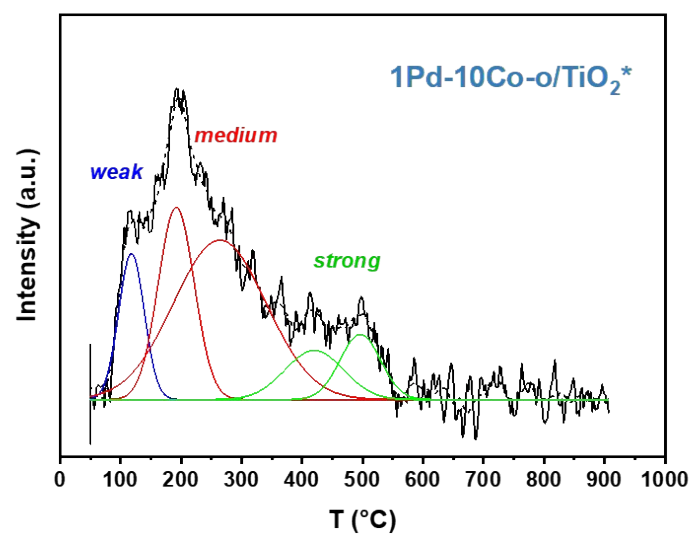

**Figure S12.** CO<sub>2</sub>-TPD profiles and deconvolutions of mono and bimetallic catalysts.

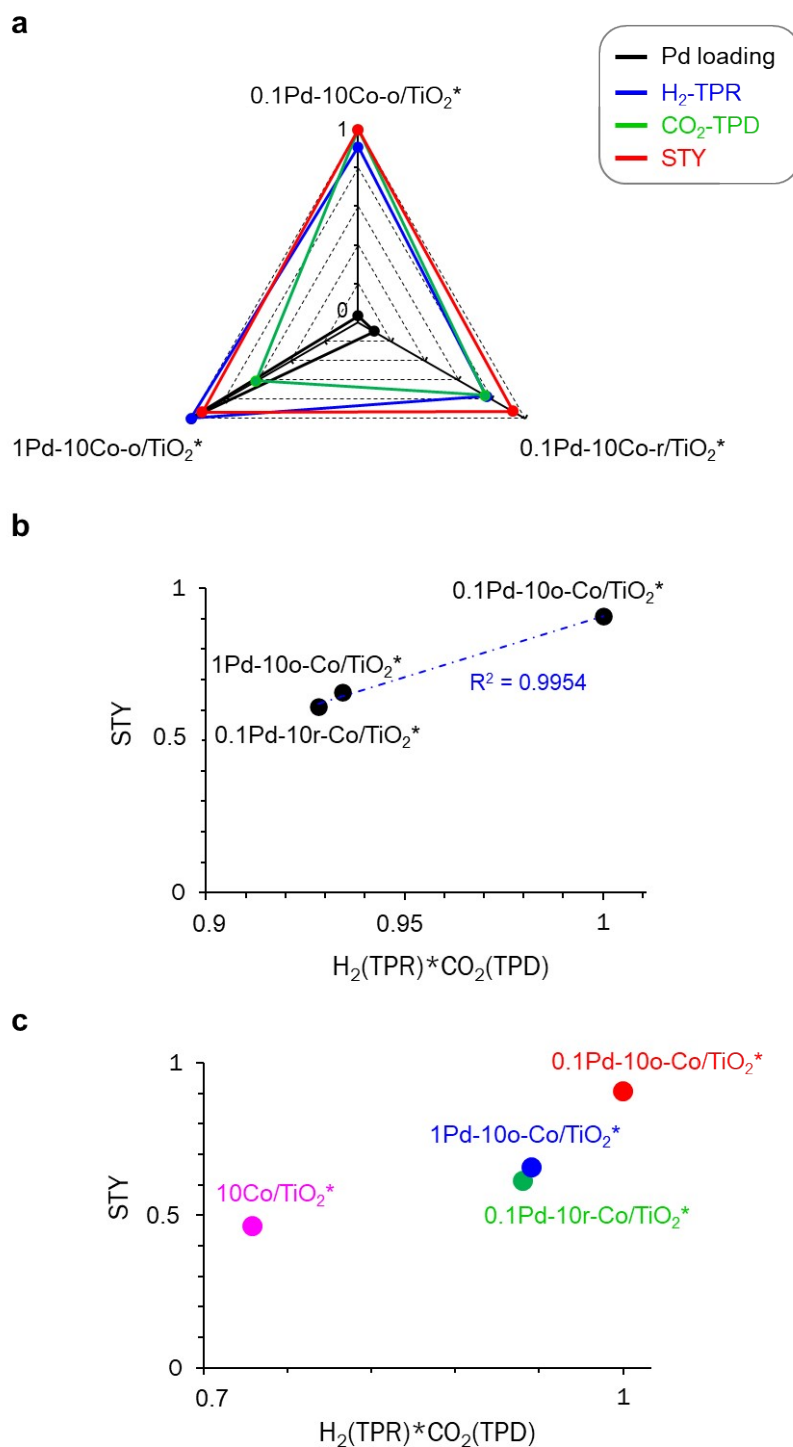

**Figure S13.** **a** Radar chart including the main measured parameters and the measured STY on a 0-1 scale. **b** Correlation between the two most relevant parameters and STY taken the values calculated on a 0-1 scale. **c** Correlation between the two most relevant parameters and STY taken the values calculated on a 0-1 scale for the 10Co/TiO<sub>2</sub>\* catalyst and the bimetallic catalysts.

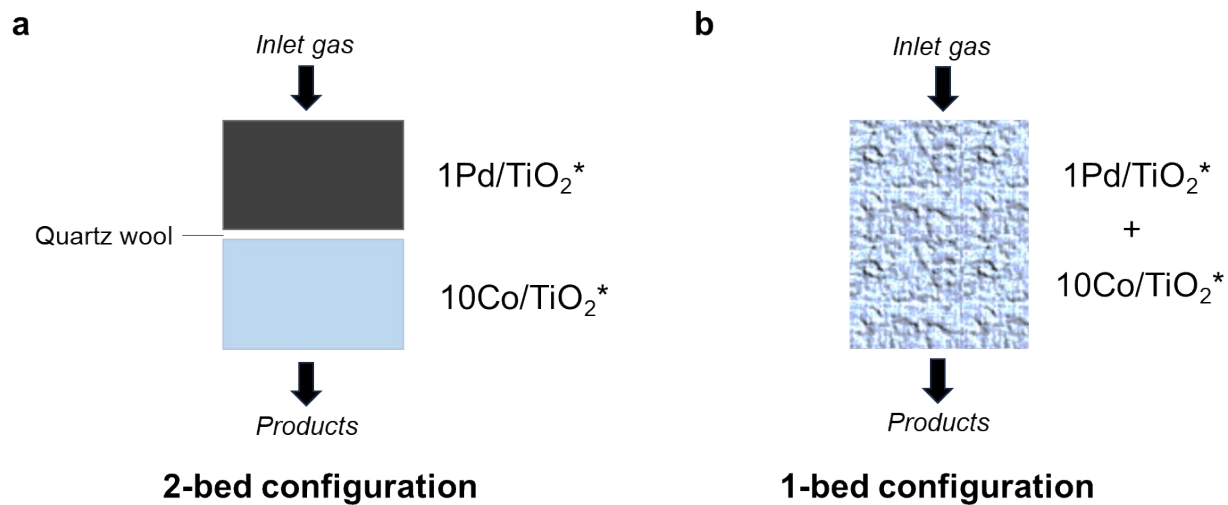

**Figure S14.** Different configurations used for the monometallic catalysts: **a** 2-beds configuration; and **b** 1-bed configuration.

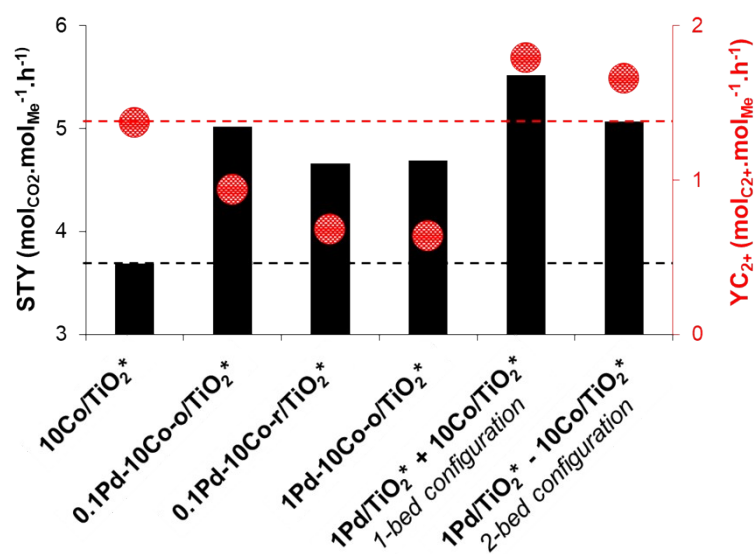

**Figure S15.** STY (mol<sub>CO2</sub> mol<sub>Me</sub><sup>-1</sup> h<sup>-1</sup>) and yields Y (mol<sub>Z</sub> mol<sub>Me</sub><sup>-1</sup> h<sup>-1</sup>, Z = C<sub>2+</sub>) of the mono- and bimetallic catalysts at 25 hours on stream, T = 220 °C, P = 20 bar, WHSV = 1620 mL g<sub>cat</sub><sup>-1</sup> h<sup>-1</sup>.
